# Supplementary material for: DeepT3 2.0: improving type III secreted effector predictions by an integrative deep learning framework
Source: PubMed Central journal article supplement — NAR Genom Bioinform. 2021 Oct 4;3(4):lqab086. doi: 10.1093/nargab/lqab086 (PMC8489581; doi:10.1093/nargab/lqab086), 2021-10-04
Supplement: lqab086_supplemental_file.pdf [file lqab086_supplemental_file.pdf]

## Supplementary Materials

DeepT3 2.0: improving type III secreted effector predictions by an  
integrative deep-learning framework

Runyu Jing<sup>1,2</sup>, Tingke Wen<sup>1</sup>, Chengxiang Liao<sup>1</sup>, Li Xue<sup>3</sup>, Fengjuan Liu<sup>4</sup>, Lezheng  
Yu<sup>5,\*</sup> and Jiesi Luo<sup>6,7,8\*</sup>

<sup>1</sup>School of Cyber Science and Engineering, Sichuan University, Chengdu 610065, China, <sup>2</sup>Medical Big Data Center, Sichuan University, Chengdu 610065, China, <sup>3</sup>School of Public Health, Southwest Medical University, Luzhou 646000, China, <sup>4</sup>School of Geography and Resources, Guizhou Education University, Guiyang 550018, China, <sup>5</sup>School of Chemistry and Materials Science, Guizhou Education University, Guiyang 550018, China, <sup>6</sup>Department of Pharmacology, School of Pharmacy, Southwest Medical University, Luzhou 646000, China, <sup>7</sup>Department of Pharmacy, The Affiliated Hospital of Southwest Medical University, Luzhou 646000, China and <sup>8</sup>Sichuan Key Medical Laboratory of New Drug Discovery and Druggability Evaluation, Luzhou Key Laboratory of Activity Screening and Druggability Evaluation for Chinese Materia Medica, Southwest Medical University, Luzhou 646000, China

## Supplementary Figures

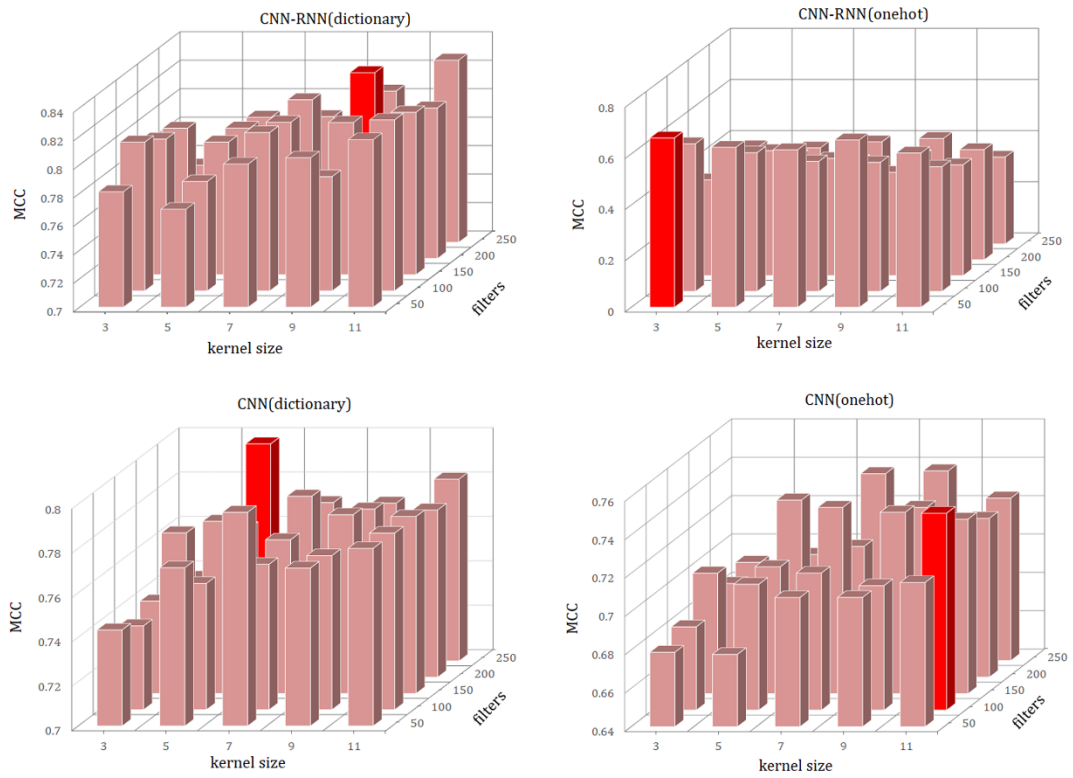

**Supplementary Figure 1.** Hyperparametric optimization of four deep learning models using the *MCC* values.

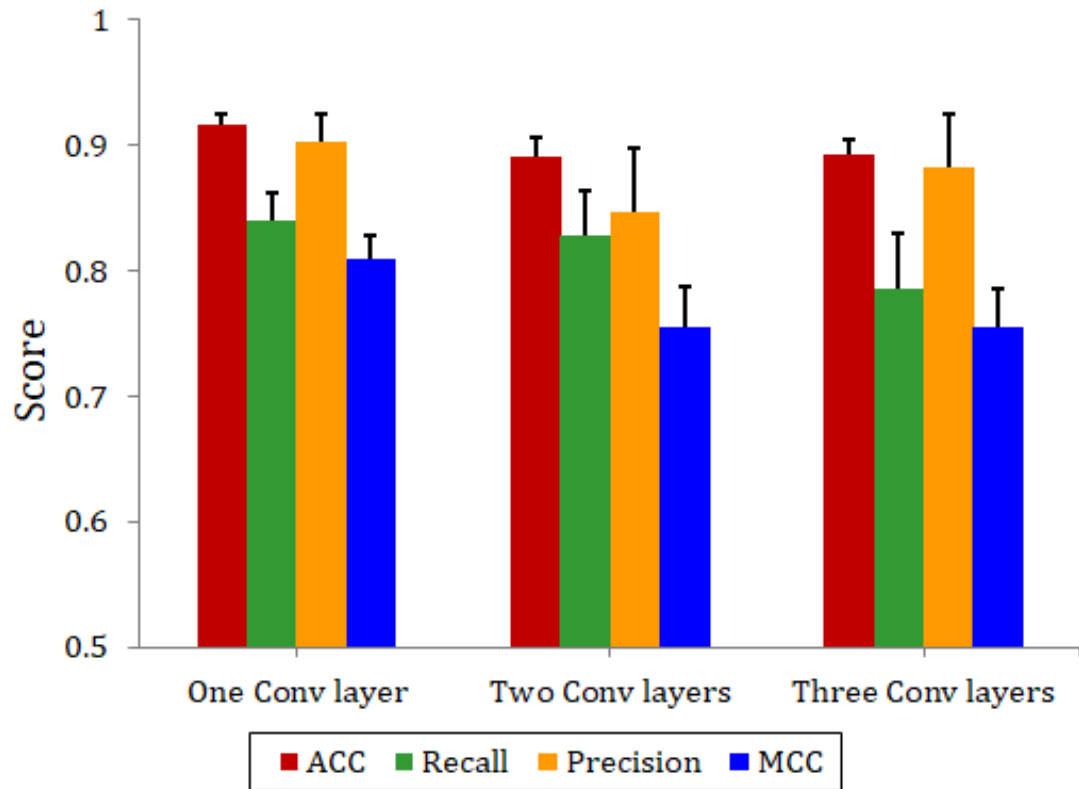

**Supplementary Figure 2.** Performance comparison of *CNN-RNN(dictionary)* models with different number of convolutional layers.

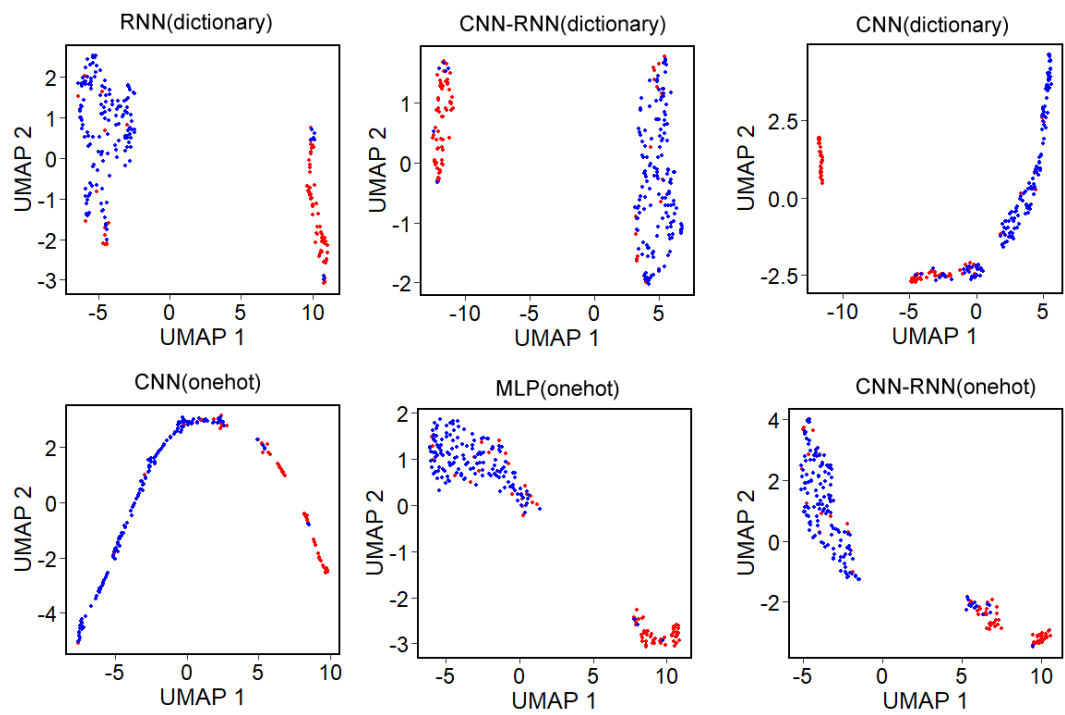

**Supplementary Figure 3.** Comparison of the last hidden layer representations of the test set for the six deep learning models.

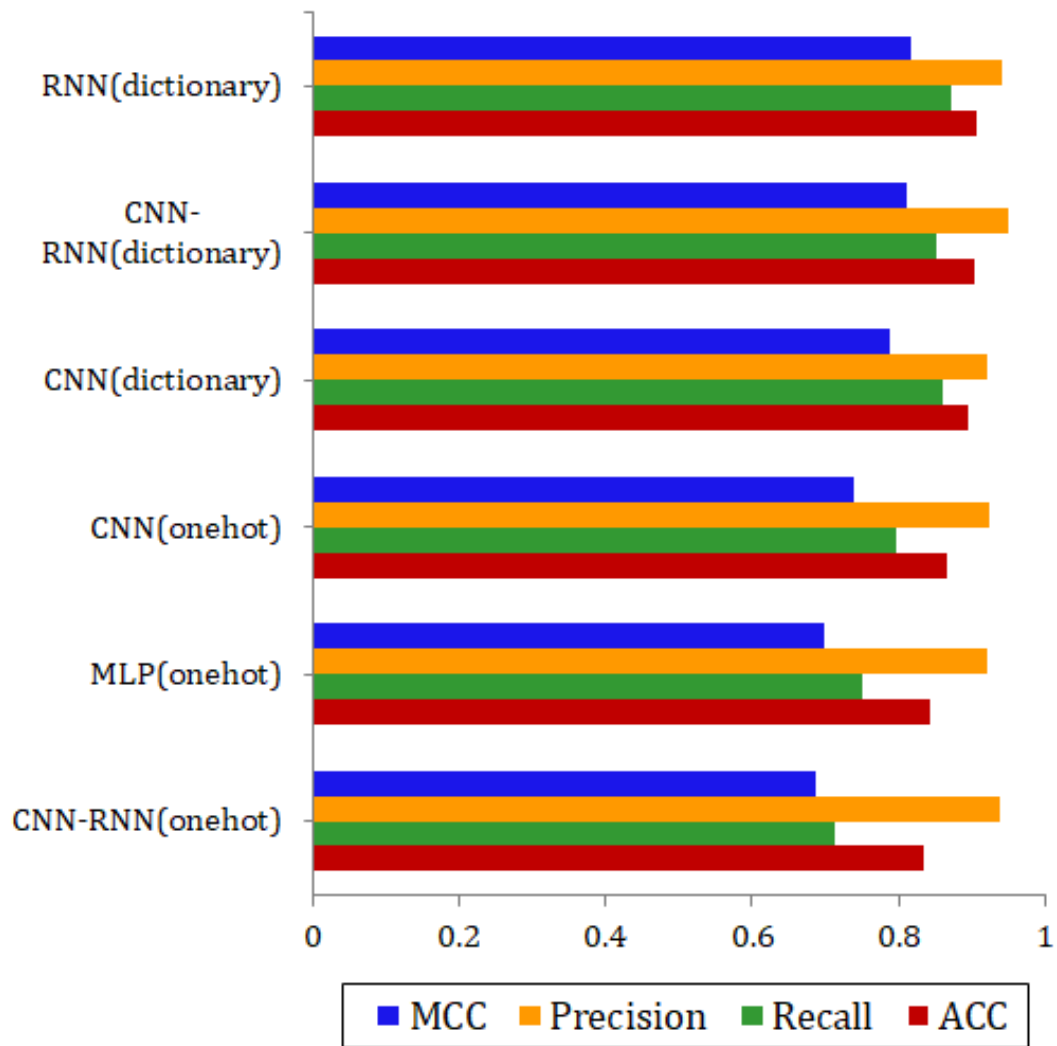

**Supplementary Figure 4.** Performance comparison of different models on the Bastion3 independent set.

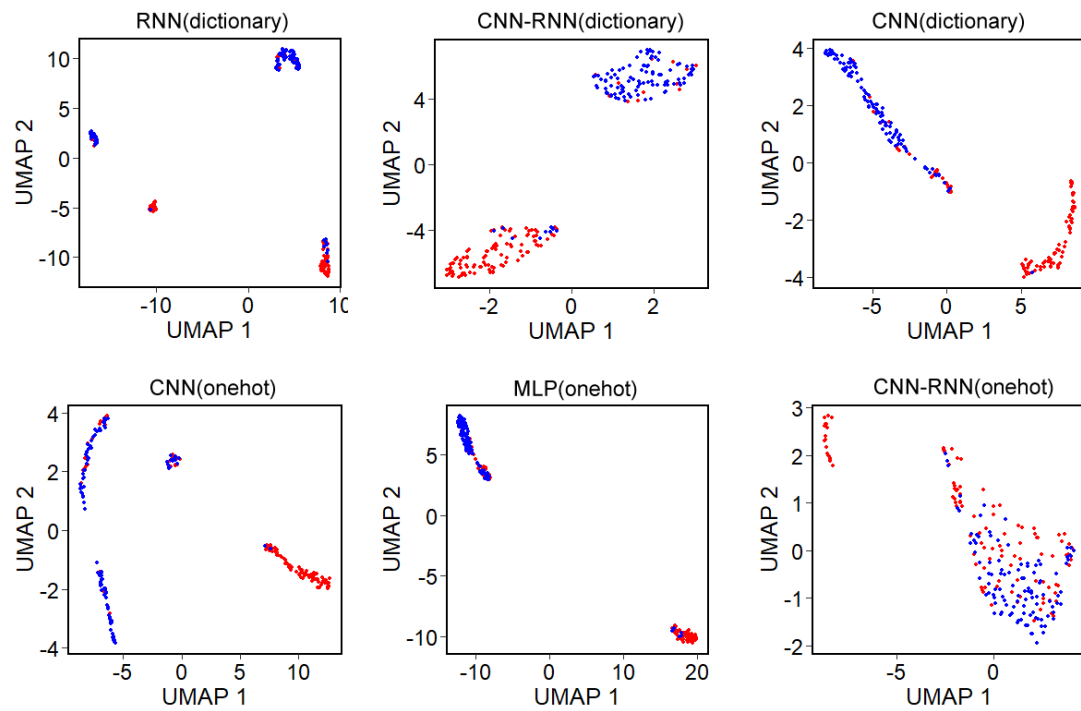

**Supplementary Figure 5.** Comparison of the last hidden layer representations of the Bastion3 independent set for the six deep learning models.

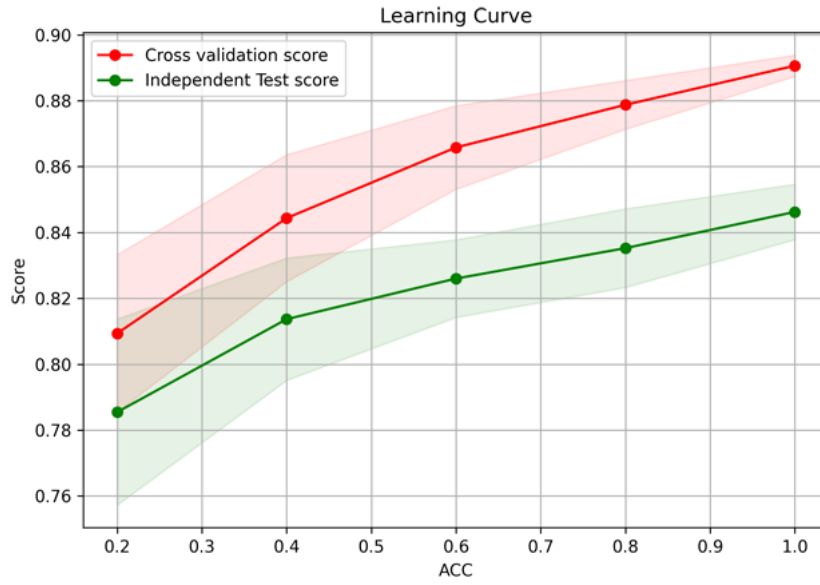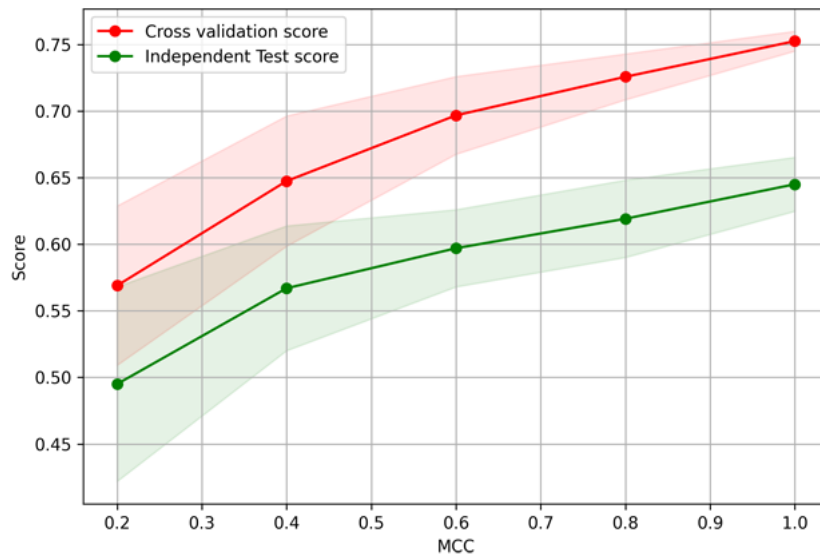

**Supplementary Figure 6.** Learning curves of DeepT3 2.0 using the *ACC* and *MCC* scores.

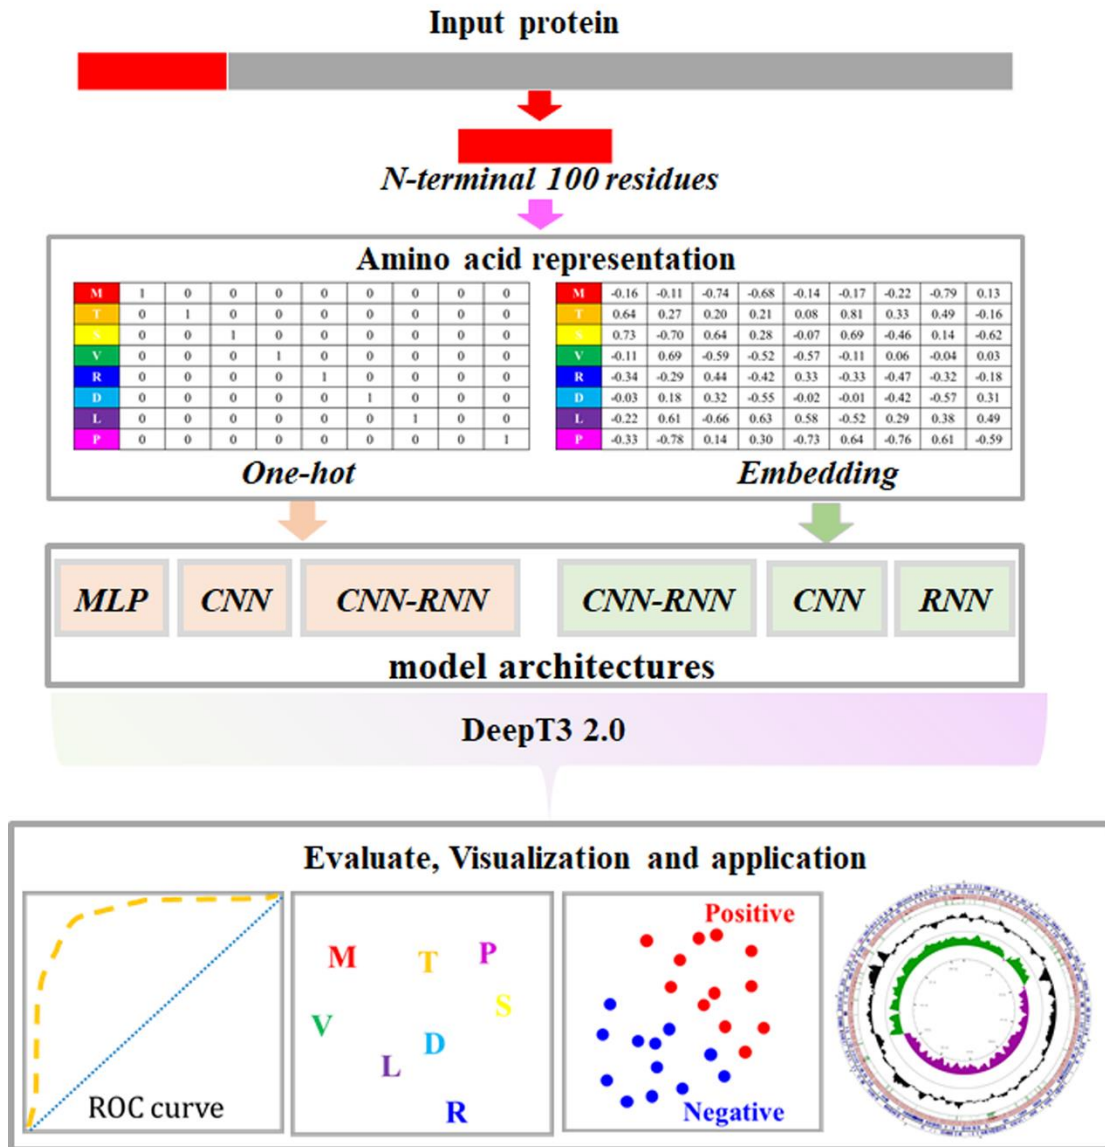

**Supplementary Figure 7.** The overall flow chart of DeepT3 2.0.



## Supplementary Tables

**Supplementary Table 1.** DeepT3 2.0 predicted 200 putative effector candidates in the *Chlamydia trachomatis* genome

| ID             | Name                                                          |
|----------------|---------------------------------------------------------------|
| WP_009873042.1 | SctW family type III secretion system gatekeeper subunit CopN |
| WP_009871965.1 | inclusion-associated protein                                  |
| WP_009871941.1 | SycD/LcrH family type III secretion system chaperone Scc2     |
| WP_009872104.1 | cadmium-translocating P-type ATPase                           |
| WP_009872009.1 | exodeoxyribonuclease V subunit beta                           |
| WP_009871579.1 | inclusion membrane protein IncB                               |
| WP_010725191.1 | autotransporter domain-containing protein                     |
| WP_010725099.1 | DUF1669 domain-containing protein                             |
| WP_009873324.1 | aminotransferase class V-fold PLP-dependent enzyme            |
| WP_009872236.1 | DUF720 domain-containing protein                              |
| WP_010725201.1 | (d)CMP kinase                                                 |
| WP_010725149.1 | IncA family protein                                           |
| WP_010725128.1 | IncA family protein                                           |
| WP_009873080.1 | IncA family protein                                           |
| WP_009871620.1 | DUF5399 domain-containing protein                             |
| WP_009872237.1 | DUF720 domain-containing protein                              |
| WP_010725368.1 | CT847 family type III secretion system effector               |
| WP_010725374.1 | type III secretion system translocon subunit CopB2            |
| WP_010725373.1 | type III secretion system translocon subunit CopD2            |
| WP_009871944.1 | type III secretion system translocon subunit CopD             |
| WP_009871943.1 | type III secretion system translocon subunit CopB             |
| WP_009871695.1 | endopeptidase La                                              |
| WP_009872625.1 | nucleotide exchange factor GrpE                               |

|                |                                                                                     |
|----------------|-------------------------------------------------------------------------------------|
| WP_010725304.1 | type III secretion system effector protein                                          |
| WP_010725032.1 | type III secretion system effector protein                                          |
| WP_009872258.1 | deubiquitinase                                                                      |
| WP_009872257.1 | deubiquitinase                                                                      |
| WP_009871466.1 | inclusion membrane protein IncA                                                     |
| WP_009871465.1 | inclusion membrane protein IncG                                                     |
| WP_010725172.1 | chorismate synthase                                                                 |
| WP_010724989.1 | signal recognition particle protein                                                 |
| WP_010725336.1 | tRNA (adenosine(37)-N6)-dimethylallyltransferase MiaA                               |
| WP_010725333.1 | alanine--tRNA ligase                                                                |
| WP_009871719.1 | 3-phosphoshikimate 1-carboxyvinyltransferase                                        |
| WP_010725163.1 | DNA polymerase III subunit gamma/tau                                                |
| WP_009871828.1 | DNA repair protein RecO                                                             |
| WP_010725310.1 | trigger factor                                                                      |
| WP_009872047.1 | protein arginine kinase                                                             |
| WP_009871354.1 | ribonuclease HIII                                                                   |
| WP_010725202.1 | type III secretion system actin-recruiting effector Tarp                            |
| WP_010725041.1 | 4-alpha-glucanotransferase                                                          |
| WP_009871788.1 | uroporphyrinogen-III synthase                                                       |
| WP_009871687.1 | HPr family phosphocarrier protein                                                   |
| WP_009871783.1 | UPF0158 family protein                                                              |
| WP_009873064.1 | ABC transporter ATP-binding protein                                                 |
| WP_009871480.1 | class I SAM-dependent methyltransferase                                             |
| WP_009873051.1 | phosphatidylserine/phosphatidylglycerophosphate/cardiolipin synthase family protein |
| WP_009872088.1 | hypothetical protein                                                                |
| WP_009871795.1 | hypothetical protein                                                                |
| WP_009872189.1 | insulinase family protein                                                           |
| WP_009872094.1 | hypothetical protein                                                                |

|                |                                                                                |
|----------------|--------------------------------------------------------------------------------|
| WP_009871688.1 | hypothetical protein                                                           |
| WP_010725165.1 | HEAT repeat domain-containing protein                                          |
| WP_009871736.1 | HEAT repeat domain-containing protein                                          |
| WP_010724983.1 | PhoH family protein                                                            |
| WP_010725193.1 | Pmp family polymorphic membrane protein autotransporter adhesin                |
| NP_220390.1    | deubiquitinase [Chlamydia trachomatis D/UW-3/CX]                               |
| NP_220389.1    | deubiquitinase [Chlamydia trachomatis D/UW-3/CX]                               |
| NP_220385.1    | hypothetical protein CT_863 [Chlamydia trachomatis D/UW-3/CX]                  |
| NP_220383.1    | type III secretion system translocator CopB2 [Chlamydia trachomatis D/UW-3/CX] |
| NP_220382.1    | type III secretion system translocator CopD2 [Chlamydia trachomatis D/UW-3/CX] |
| NP_220370.1    | hypothetical protein CT_849 [Chlamydia trachomatis D/UW-3/CX]                  |
| NP_220369.1    | hypothetical protein CT_848 [Chlamydia trachomatis D/UW-3/CX]                  |
| NP_220368.1    | hypothetical protein CT_847 [Chlamydia trachomatis D/UW-3/CX]                  |
| NP_220333.1    | inclusion membrane protein [Chlamydia trachomatis D/UW-3/CX]                   |
| NP_220326.1    | insulinase/protease [Chlamydia trachomatis D/UW-3/CX]                          |
| NP_220287.1    | hypothetical protein CT_768 [Chlamydia trachomatis D/UW-3/CX]                  |
| NP_220285.1    | tRNA dimethylallyltransferase [Chlamydia trachomatis D/UW-3/CX]                |
| NP_220268.1    | alanine--tRNA ligase [Chlamydia trachomatis D/UW-3/CX]                         |
| NP_220246.1    | metal transporting ATPase [Chlamydia trachomatis D/UW-3/CX]                    |
| NP_220240.1    | aminotransferase [Chlamydia trachomatis D/UW-3/CX]                             |
| NP_220237.1    | hypothetical protein CT_718 [Chlamydia trachomatis D/UW-3/CX]                  |
| NP_220231.1    | type III secretion system effector protein [Chlamydia trachomatis D/UW-3/CX]   |
| NP_220226.1    | trigger factor [Chlamydia trachomatis D/UW-3/CX]                               |
| NP_220214.1    | hypothetical protein CT_695 [Chlamydia trachomatis D/UW-3/CX]                  |
| NP_220213.1    | hypothetical protein CT_694 [Chlamydia trachomatis D/UW-3/CX]                  |
| NP_220194.1    | protein-arginine kinase [Chlamydia trachomatis D/UW-3/CX]                      |
| NP_220175.1    | hypothetical protein CT_656 [Chlamydia trachomatis D/UW-3/CX]                  |

NP\_220160.1 hypothetical protein CT\_642 [Chlamydia trachomatis D/UW-3/CX]

NP\_220157.1 exodeoxyribonuclease V subunit beta [Chlamydia trachomatis D/UW-3/CX]

NP\_220139.1 hypothetical protein CT\_622 [Chlamydia trachomatis D/UW-3/CX]

NP\_220138.1 hypothetical protein CT\_621 [Chlamydia trachomatis D/UW-3/CX]

NP\_220137.1 hypothetical protein CT\_620 [Chlamydia trachomatis D/UW-3/CX]

NP\_220135.1 hypothetical protein CT\_618 [Chlamydia trachomatis D/UW-3/CX]

NP\_220114.1 hypothetical protein CT\_598 [Chlamydia trachomatis D/UW-3/CX]

NP\_220094.1 type III secretion system translocator CopD

NP\_220093.1 type III secretion system translocator CopB [Chlamydia trachomatis D/UW-3/CX]

NP\_220091.1 type III secretion low calcium response chaperone [Chlamydia trachomatis D/UW-3/CX]

NP\_220087.1 type II secretion system protein D [Chlamydia trachomatis D/UW-3/CX]

NP\_220065.1 hypothetical protein CT\_550 [Chlamydia trachomatis D/UW-3/CX]

NP\_220044.1 hypothetical protein CT\_529 [Chlamydia trachomatis D/UW-3/CX]

NP\_219997.1 hypothetical protein CT\_483 [Chlamydia trachomatis D/UW-3/CX]

NP\_219983.1 DNA repair protein RecO [Chlamydia trachomatis D/UW-3/CX]

NP\_219978.1 hypothetical protein CT\_465 [Chlamydia trachomatis D/UW-3/CX]

NP\_219969.1 translocated actin-recruiting phosphoprotein [Chlamydia trachomatis D/UW-3/CX]

NP\_219965.1 cytidylate kinase [Chlamydia trachomatis D/UW-3/CX]

NP\_219962.1 hypothetical protein CT\_449 [Chlamydia trachomatis D/UW-3/CX]

NP\_219954.1 hypothetical protein CT\_442 [Chlamydia trachomatis D/UW-3/CX]

NP\_219952.1 hypothetical protein CT\_440 [Chlamydia trachomatis D/UW-3/CX]

NP\_219945.1 hypothetical protein CT\_433 [Chlamydia trachomatis D/UW-3/CX]

NP\_219941.1 hypothetical protein CT\_429 [Chlamydia trachomatis D/UW-3/CX]

NP\_219924.1 outer membrane protein PmpC [Chlamydia trachomatis D/UW-3/CX]

NP\_219923.1 outer membrane protein PmpB [Chlamydia trachomatis D/UW-3/CX]

NP\_219905.1 stress response protein GrpE [Chlamydia trachomatis D/UW-3/CX]

NP\_219894.1 hypothetical protein CT\_384 [Chlamydia trachomatis D/UW-3/CX]

NP\_219893.1 hypothetical protein CT\_383 [Chlamydia trachomatis D/UW-3/CX]

NP\_219882.1 pyruvoyl-dependent arginine decarboxylase [Chlamydia trachomatis D/UW-3/CX]

NP\_219877.1 chorismate synthase [Chlamydia trachomatis D/UW-3/CX]

NP\_219875.1 phosphoshikimate 1-carboxyvinyltransferase [Chlamydia trachomatis D/UW-3/CX]

NP\_219874.1 hypothetical protein CT\_365 [Chlamydia trachomatis D/UW-3/CX]

NP\_219867.1 hypothetical protein CT\_358 [Chlamydia trachomatis D/UW-3/CX]

NP\_219866.1 hypothetical protein CT\_357 [Chlamydia trachomatis D/UW-3/CX]

NP\_219857.1 hypothetical protein CT\_350 [Chlamydia trachomatis D/UW-3/CX]

NP\_219852.1 hypothetical protein CT\_345 [Chlamydia trachomatis D/UW-3/CX]

NP\_219851.1 Lon protease [Chlamydia trachomatis D/UW-3/CX]

NP\_219845.1 hypothetical protein CT\_338 [Chlamydia trachomatis D/UW-3/CX]

NP\_219844.1 phosphocarrier protein Hpr [Chlamydia trachomatis D/UW-3/CX]

NP\_219841.1 DNA polymerase III subunit gamma and tau [Chlamydia trachomatis D/UW-3/CX]

NP\_219832.1 hypothetical protein CT\_326.1 [Chlamydia trachomatis D/UW-3/CX]

NP\_219805.1 hypothetical protein CT\_300 [Chlamydia trachomatis D/UW-3/CX]

NP\_219793.1 hypothetical protein CT\_288 [Chlamydia trachomatis D/UW-3/CX]

NP\_219778.1 hypothetical protein CT\_273 [Chlamydia trachomatis D/UW-3/CX]

NP\_219738.1 inclusion membrane protein C [Chlamydia trachomatis D/UW-3/CX]

NP\_219737.1 inclusion membrane protein B [Chlamydia trachomatis D/UW-3/CX]

NP\_219734.1 inclusion membrane protein [Chlamydia trachomatis D/UW-3/CX]

NP\_219733.1 inclusion membrane protein [Chlamydia trachomatis D/UW-3/CX]

NP\_219728.1 inclusion membrane protein [Chlamydia trachomatis D/UW-3/CX]

NP\_219718.1 inclusion membrane protein [Chlamydia trachomatis D/UW-3/CX]

NP\_219684.1 ABC transporter ATP-binding protein [Chlamydia trachomatis D/UW-3/CX]

NP\_219669.1 hypothetical protein CT\_166 [Chlamydia trachomatis D/UW-3/CX]

NP\_219668.1 hypothetical protein CT\_165 [Chlamydia trachomatis D/UW-3/CX]

NP\_219667.1 hypothetical protein CT\_164 [Chlamydia trachomatis D/UW-3/CX]

NP\_219664.1 hypothetical protein CT\_161 [Chlamydia trachomatis D/UW-3/CX]

NP\_219660.1 phospholipase [Chlamydia trachomatis D/UW-3/CX]

NP\_219658.1 phosphatidylcholine-hydrolyzing phospholipase D [Chlamydia trachomatis D/UW-3/CX]

NP\_219657.1 hypothetical protein CT\_154 [Chlamydia trachomatis D/UW-3/CX]

NP\_219650.1 hypothetical protein CT\_147 [Chlamydia trachomatis D/UW-3/CX]

NP\_219647.1 hypothetical protein CT\_144 [Chlamydia trachomatis D/UW-3/CX]

NP\_219646.1 hypothetical protein CT\_143 [Chlamydia trachomatis D/UW-3/CX]

NP\_219645.1 hypothetical protein CT\_142 [Chlamydia trachomatis D/UW-3/CX]

NP\_219644.1 preprotein translocase SecA [Chlamydia trachomatis D/UW-3/CX]

NP\_219642.1 oligopeptide ABC transporter substrate-binding protein [Chlamydia trachomatis D/UW-3/CX]

NP\_219641.1 microsomal dipeptidase [Chlamydia trachomatis D/UW-3/CX]

NP\_219636.1 methyltransferase [Chlamydia trachomatis D/UW-3/CX]

NP\_219622.1 inclusion membrane protein A [Chlamydia trachomatis D/UW-3/CX]

NP\_219621.1 inclusion membrane protein G [Chlamydia trachomatis D/UW-3/CX]

NP\_219608.1 hypothetical protein CT\_105 [Chlamydia trachomatis D/UW-3/CX]

NP\_219592.1 low calcium response protein E [Chlamydia trachomatis D/UW-3/CX]

NP\_219590.1 4-alpha glucanotransferase [Chlamydia trachomatis D/UW-3/CX]

NP\_219586.1 hypothetical protein CT\_083 [Chlamydia trachomatis D/UW-3/CX]

NP\_219585.1 hypothetical protein CT\_082 [Chlamydia trachomatis D/UW-3/CX]

NP\_219553.1 hypothetical protein CT\_050 [Chlamydia trachomatis D/UW-3/CX]

NP\_219527.1 signal recognition particle GTPase [Chlamydia trachomatis D/UW-3/CX]

NP\_219517.1 ATPase [Chlamydia trachomatis D/UW-3/CX]

NP\_219510.1 ribonuclease HII [Chlamydia trachomatis D/UW-3/CX]

NP\_219502.1 hypothetical protein CT\_875 [Chlamydia trachomatis D/UW-3/CX]

WP\_010725097.1 phospholipase D endonuclease

|                |                                                |
|----------------|------------------------------------------------|
| WP_010725256.1 | type II secretion system protein GspD          |
| WP_010725170.1 | hypothetical protein                           |
| WP_010725152.1 | hypothetical protein                           |
| WP_010725105.1 | hypothetical protein                           |
| WP_010725093.1 | hypothetical protein                           |
| WP_010725088.1 | oligopeptide-binding protein                   |
| WP_009871806.1 | hypothetical protein                           |
| WP_009871718.1 | hypothetical protein                           |
| WP_009871696.1 | hypothetical protein                           |
| WP_009871580.1 | inclusion membrane protein C                   |
| WP_009872659.1 | hypothetical protein                           |
| WP_010725175.1 | pyruvoyl-dependent arginine decarboxylase AaxB |
| WP_010725087.1 | dipeptidase                                    |
| WP_010725107.1 | hypothetical protein                           |
| WP_010725106.1 | hypothetical protein                           |
| WP_009872407.1 | protein translocase                            |
| WP_009871988.1 | hypothetical protein                           |
| WP_009871893.1 | hypothetical protein                           |
| WP_009871845.1 | hypothetical protein                           |
| WP_009871823.1 | hypothetical protein                           |
| WP_009871735.1 | hypothetical protein                           |
| WP_009871674.1 | hypothetical protein                           |
| WP_009871560.1 | hypothetical protein                           |
| WP_009871489.1 | hypothetical protein                           |
| WP_009871488.1 | hypothetical protein                           |
| WP_009872823.1 | hypothetical protein                           |
| WP_009871914.1 | hypothetical protein                           |
| WP_009871431.1 | hypothetical protein                           |
| WP_010725376.1 | hypothetical protein                           |

|                |                      |
|----------------|----------------------|
| WP_010725353.1 | hypothetical protein |
| WP_010725337.1 | hypothetical protein |
| WP_010725305.1 | hypothetical protein |
| WP_010725287.1 | hypothetical protein |
| WP_010725278.1 | hypothetical protein |
| WP_010725277.1 | hypothetical protein |
| WP_010725275.1 | hypothetical protein |
| WP_010725169.1 | hypothetical protein |
| WP_010725130.1 | hypothetical protein |
| WP_010725103.1 | hypothetical protein |
| WP_010725090.1 | hypothetical protein |
| WP_010725058.1 | hypothetical protein |
| WP_010725007.1 | hypothetical protein |
| WP_010724957.1 | hypothetical protein |

---



**Supplementary Table 2.** GO terms for the predicted effectors

| GO ID      | Description                                          |
|------------|------------------------------------------------------|
| GO:0000338 | protein deneddylation                                |
| GO:0004843 | thiol-dependent ubiquitin-specific protease activity |
| GO:0005576 | extracellular region                                 |
| GO:0006508 | proteolysis                                          |
| GO:0008233 | peptidase activity                                   |
| GO:0008234 | cysteine-type peptidase activity                     |
| GO:0009405 | pathogenesis                                         |
| GO:0016020 | membrane                                             |
| GO:0016021 | integral component of membrane                       |
| GO:0016579 | protein deubiquitination                             |
| GO:0016787 | hydrolase activity                                   |
| GO:0019784 | NEDD8-specific protease activity                     |
| GO:0043657 | host cell                                            |
| GO:0042169 | SH2 domain binding                                   |
